# Supplementary material
Source: PubMed Central journal article supplement (PMC3948805)
Supplement: 04a7b39c50a3f59a264e7c675d1542f8_genetics.113.159707-4.pdf [file 04a7b39c50a3f59a264e7c675d1542f8_genetics.113.159707-4.pdf]

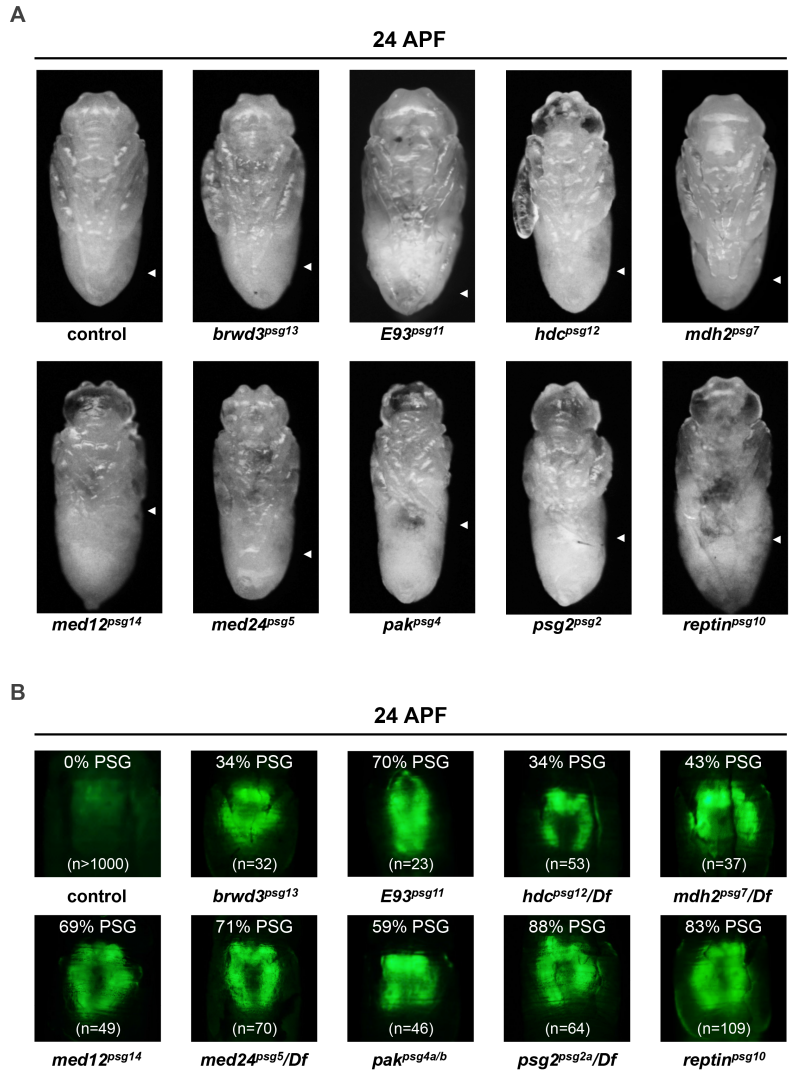

**Figure S2** Pupal morphology and PSG penetrance for PSG mutations. (A) Pupal morphology was examined by dissecting animals out of their pupal casing at 24 hours after puparium formation (APF). All PSG mutants display head capsule eversion, wing and leg inflation. White triangles mark the progression of leg extension. *med12*, *pak*, *psg2*, and *reptin* display defects in leg extension. (B) PSG mutants display a highly penetrant block in salivary gland cell death. Each image shows salivary gland-specific expression of GFP (*fkh-Gal4*, *UAS-GFP*) at 24 APF. Within each image, the percent PSG and the number of animals examined are shown in white text.
