# Supplementary material
Source: PubMed Central journal article supplement (PMC3948805)
Supplement: 5e5d3936e1a7bd87bc13c84a9eb98794_genetics.113.159707-6.pdf [file 5e5d3936e1a7bd87bc13c84a9eb98794_genetics.113.159707-6.pdf]

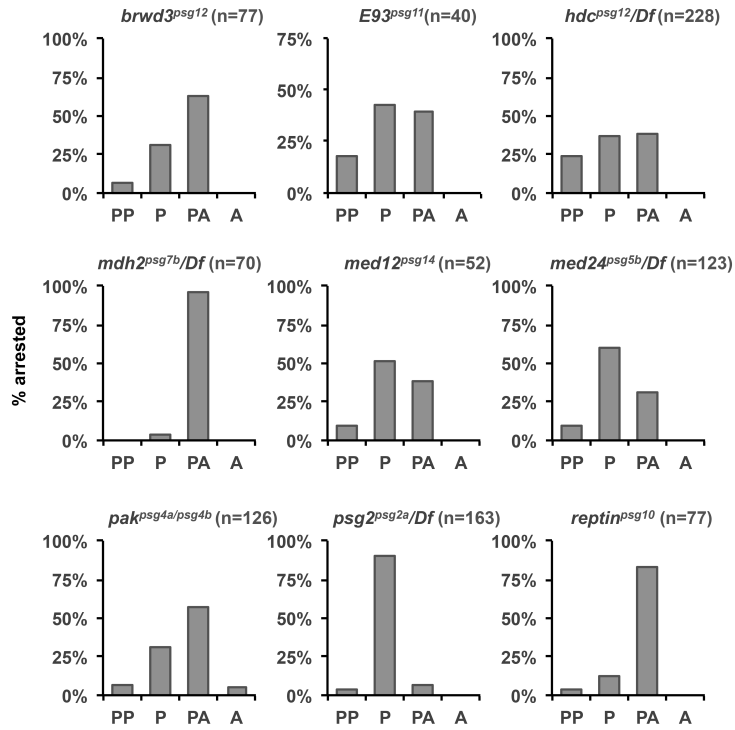

**Figure S1** Lethal phase analysis of PSG mutations. The lethal phase analysis shows that the majority of PSG mutant animals arrest after head eversion and die as pupae or pharate adults. The genotype and number of animals used for lethal phase analysis is shown above each graph. PP: prepupae, P: pupae, PA: pharate adults, A: adults eclosed.
