# Supplementary material
Source: PubMed Central journal article supplement (PMC3948805)
Supplement: 9d05dbad879684aab61c3c292a9cac51_genetics.113.159707-5.pdf [file 9d05dbad879684aab61c3c292a9cac51_genetics.113.159707-5.pdf]

**TABLE S1 Primer sequences for qPCR**

| <b>Gene</b>     | <b>Primer Sequence</b>  | <b>Source</b>             |
|-----------------|-------------------------|---------------------------|
| <i>belle</i> F  | ACCGCAGCAATGGAAACTC     | this study                |
| <i>belle</i> R  | GGTCCTTTGCCTGAAGCTG     |                           |
| <i>brwd3</i> F  | AGCAGTACAATCGCCGACAC    | this study                |
| <i>brwd3</i> R  | GGTACACATCCGCAAGCTG     |                           |
| <i>hdc</i> F    | CTCTCATCGCTGGCCAATC     | this study                |
| <i>hdc</i> R    | GTGCGTCCCTCGTATTTAACCT  |                           |
| <i>mdh2</i> F   | TCACCGACTTGGCGCTCTAC    | this study                |
| <i>mdh2</i> R   | GAGATGTCTTGATGATGCCGG   |                           |
| <i>med12</i> F  | GCAGCAACAGTGGCACAATG    | this study                |
| <i>med12</i> R  | GAGTTGGCATTCAACGGCGG    |                           |
| <i>med24</i> F  | CGTTGCTCCAGTACGTGGTG    | this study                |
| <i>med24</i> R  | CATTTCTTTGCGGCTCTCCAG   |                           |
| <i>psg2</i> F   | GCTACCAACGCAAGGACCTC    | this study                |
| <i>psg2</i> R   | GTAGTTTCCGCTTTAGTCCTGCA |                           |
| <i>pak</i> F    | GGTCCATGTGGGATTCGATGC   | this study                |
| <i>pak</i> R    | CTTCTTCTGCTCCTGCTTGCT   |                           |
| <i>reptin</i> F | CCAAGTATTACCACAGCCAAC   | this study                |
| <i>reptin</i> R | GTCCCTTTCCACCTCCTCGG    |                           |
| <i>Sgs3</i> F   | CTACCGCCCTAGCGAGCAT     | CHIANG <i>et al.</i> 2003 |
| <i>Sgs3</i> R   | GCATCCACAATCGCAACAGT    |                           |
| <i>Rpl18a</i> F | ACGTCCAACATGAGAGCCAAG   | this study                |
| <i>Rpl18a</i> R | CTGCTTGATGGACACGATCTC   |                           |
| <i>UbcD6 F1</i> | ACATATTGCAGAACCGCTGG    | this study                |
| <i>UbcD6 R1</i> | GCTTTCACACGCTTCTCGT     |                           |
