# Supplementary material
Source: PubMed Central journal article supplement (PMC3948805)
Supplement: 5533dfa473123a204b3e2b9a561a2a82_genetics.113.159707-1.pdf [file 5533dfa473123a204b3e2b9a561a2a82_genetics.113.159707-1.pdf]

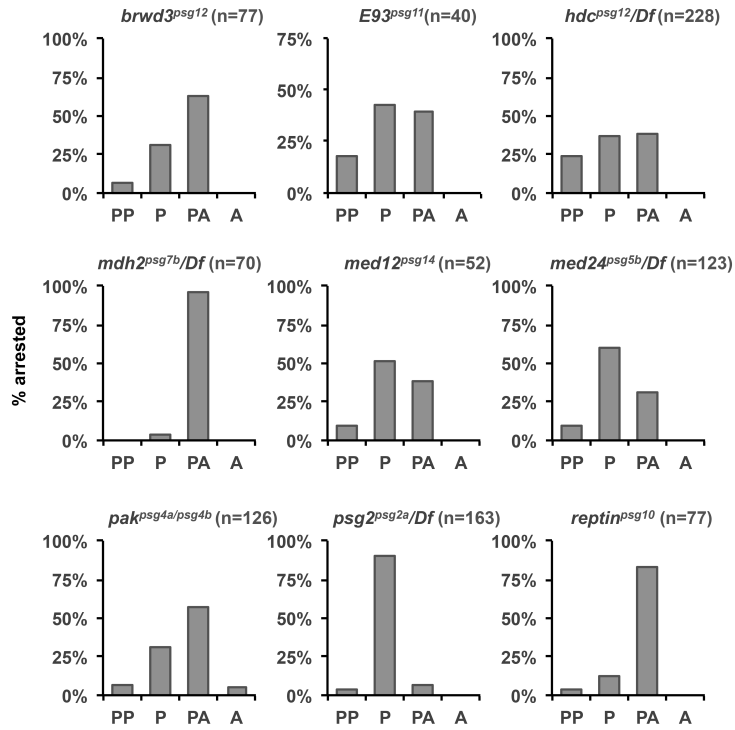

**Figure S1** Lethal phase analysis of PSG mutations. The lethal phase analysis shows that the majority of PSG mutant animals arrest after head eversion and die as pupae or pharate adults. The genotype and number of animals used for lethal phase analysis is shown above each graph. PP: prepupae, P: pupae, PA: pharate adults, A: adults eclosed.

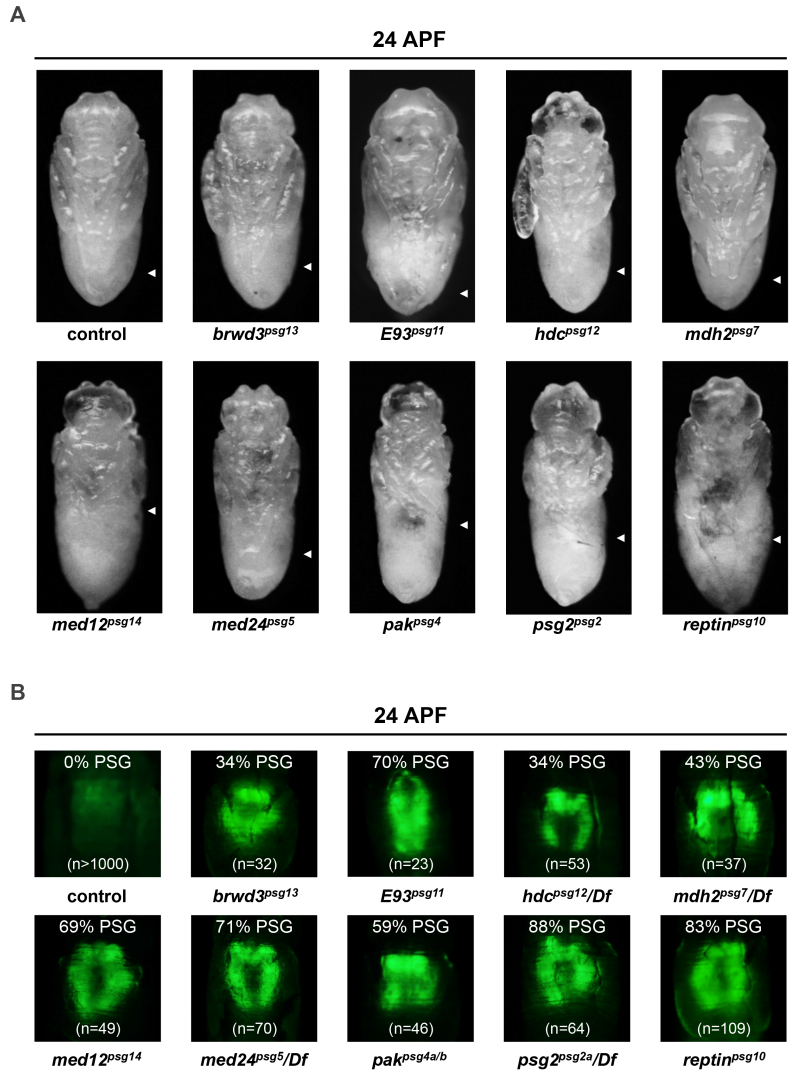

**Figure S2** Pupal morphology and PSG penetrance for PSG mutations. (A) Pupal morphology was examined by dissecting animals out of their pupal casing at 24 hours after puparium formation (APF). All PSG mutants display head capsule eversion, wing and leg inflation. White triangles mark the progression of leg extension. *med12*, *pak*, *psg2*, and *reptin* display defects in leg extension. (B) PSG mutants display a highly penetrant block in salivary gland cell death. Each image shows salivary gland-specific expression of GFP (*fkh-Gal4*, *UAS-GFP*) at 24 APF. Within each image, the percent PSG and the number of animals examined are shown in white text.

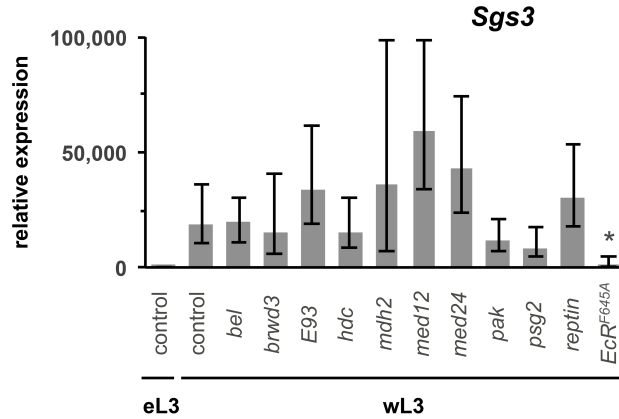

**Figure S3** Induction of the glue gene *Sgs3* in response to the mid-L3 pulse of ecdysone. *Sgs3* is massively induced in salivary glands after the mid-L3 pulse of ecdysone; the amount of *Sgs3* mRNA made is easily detectable by qPCR in extracts of total mRNA from whole animals at wandering third instar stages (wL3). wL3 controls display an ~18,500-fold increase of *Sgs3* mRNA when compared to third instar animals prior to the mid-L3 pulse (early L3 or eL3). All PSG mutant wL3 animals show robust induction of *Sgs3* mRNA. In contrast, salivary gland-specific expression of *Ecr<sup>F645A</sup>* using the *Sgs3* promoter (*uas-Ecr<sup>F645A</sup>/+*; *Sgs3-GAL4/+*) shows a nine-fold decrease in the induction of *Sgs3* mRNA, highlighting the requirement of ecdysone signaling for continued expression of *Sgs3*. y-axis plots relative expression of target genes compared to eL3 controls and normalized to *rp49*. x-axis shows control animals at eL3 and wL3 stages, and mutant animals at wL3 stages. Each bar represents 3 independent biological samples; asterisks indicate a significant changes in expression compared to control animals at wL3 ( $p$ -values < 0.05).

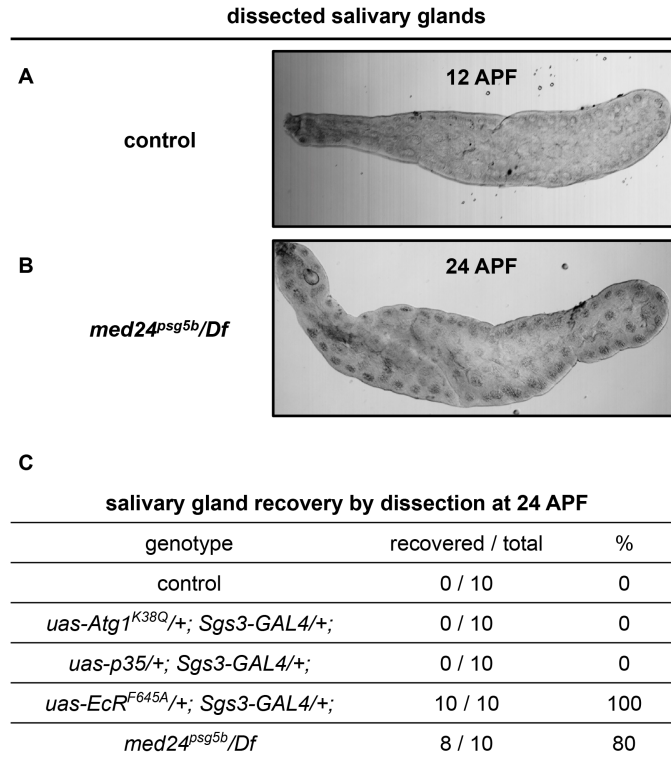

**Figure S4** Ability to recover larval salivary glands 24 hours after puparium formation (APF). (A) Although control salivary glands are easily recovered at 12 APF, immediately before tissue destruction begins, they cannot be recovered a few hours later. (B) *med24* mutant glands, however, can be recovered by dissection 12 hours later at 24 APF. Note that mutant glands appear morphologically “intact,” similar to control glands at 12 APF. (C) Table summarizing the ability to recover larval salivary gland by dissection at 24 APF. Column one indicates the genotype, column two the number recovered over the total number of glands dissected and column three the percentage recovered. Only an upstream block in salivary gland destruction caused by overexpressing *EcR<sup>F645A</sup>* or a mutation in *med24* leads to a complete block in gland destruction, which allows for recovery by dissection at 24 APF. Blocking activation of caspases or autophagy, by expression of either the caspase inhibitor *p35* or the autophagy inhibitor *Atg1<sup>K38Q</sup>*, does not allow gland recovery at 24 APF.

**TABLE S1 Primer sequences for qPCR**

| <b>Gene</b>     | <b>Primer Sequence</b>  | <b>Source</b>             |
|-----------------|-------------------------|---------------------------|
| <i>belle</i> F  | ACCGCAGCAATGGAAACTC     | this study                |
| <i>belle</i> R  | GGTCCTTTGCCTGAAGCTG     |                           |
| <i>brwd3</i> F  | AGCAGTACAATCGCCGACAC    | this study                |
| <i>brwd3</i> R  | GGTACACATCCGCAAGCTG     |                           |
| <i>hdc</i> F    | CTCTCATCGCTGGCCAATC     | this study                |
| <i>hdc</i> R    | GTGCGTCCCTCGTATTTAACCT  |                           |
| <i>mdh2</i> F   | TCACCGACTTGGCGCTCTAC    | this study                |
| <i>mdh2</i> R   | GAGATGTCTTGATGATGCCGG   |                           |
| <i>med12</i> F  | GCAGCAACAGTGGCACAATG    | this study                |
| <i>med12</i> R  | GAGTTGGCATTCAACGGCGG    |                           |
| <i>med24</i> F  | CGTTGCTCCAGTACGTGGTG    | this study                |
| <i>med24</i> R  | CATTTCTTTGCGGCTCTCCAG   |                           |
| <i>psg2</i> F   | GCTACCAACGCAAGGACCTC    | this study                |
| <i>psg2</i> R   | GTAGTTTCCGCTTTAGTCCTGCA |                           |
| <i>pak</i> F    | GGTCCATGTGGGATTCGATGC   | this study                |
| <i>pak</i> R    | CTTCTTCTGCTCCTGCTTGCT   |                           |
| <i>reptin</i> F | CCAAGTATTACCACAGCCAAC   | this study                |
| <i>reptin</i> R | GTCCCTTTCCACCTCCTCGG    |                           |
| <i>Sgs3</i> F   | CTACCGCCCTAGCGAGCAT     | CHIANG <i>et al.</i> 2003 |
| <i>Sgs3</i> R   | GCATCCACAATCGCAACAGT    |                           |
| <i>Rpl18a</i> F | ACGTCCAACATGAGAGCCAAG   | this study                |
| <i>Rpl18a</i> R | CTGCTTGATGGACACGATCTC   |                           |
| <i>UbcD6 F1</i> | ACATATTGCAGAACCGCTGG    | this study                |
| <i>UbcD6 R1</i> | GCTTTCACACGCTTCTCGT     |                           |
